# Supplementary material for: Performance of VIDAS® Diagnostic Tests for the Automated Detection of Dengue Virus NS1 Antigen and of Anti-Dengue Virus IgM and IgG Antibodies: A Multicentre, International Study
Source: MDPI journal article supplement (doi:10.3390/diagnostics13061137), 2023-03-16
Supplement: s1 [file s1]

## Supplementary Materials

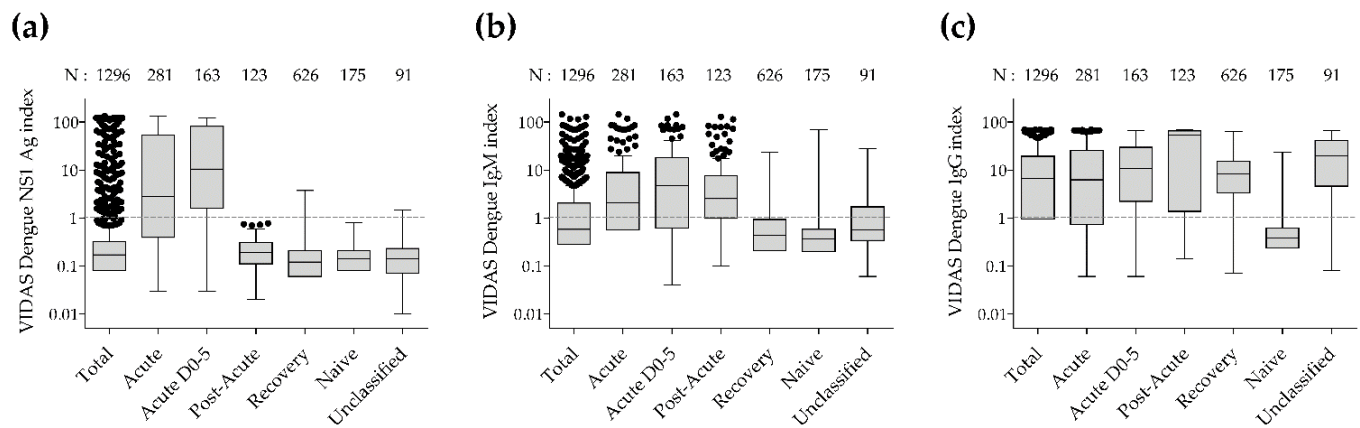

**Figure S1.** Index values of the VIDAS® dengue assays, in the total population and per DENV infection stage. VIDAS® Dengue NS1 Antigen (a), IgM (b) and IgG (c) assays were performed as described in the Methods section. Index values are depicted as Tukey boxplots in the whole study population (Total) and according to the DENV infection stages (Acute, Acute within 0 to 5 days post symptom onset [D0-5], Post-Acute, Recovery, Naïve and Unclassified), as defined in Table 3. The grey dashed line indicates the positivity cutoff ( $i = 1.0$ ). The number of samples (N) per group is shown above each box. Respective median (interquartile range) index values are shown in Table S2.

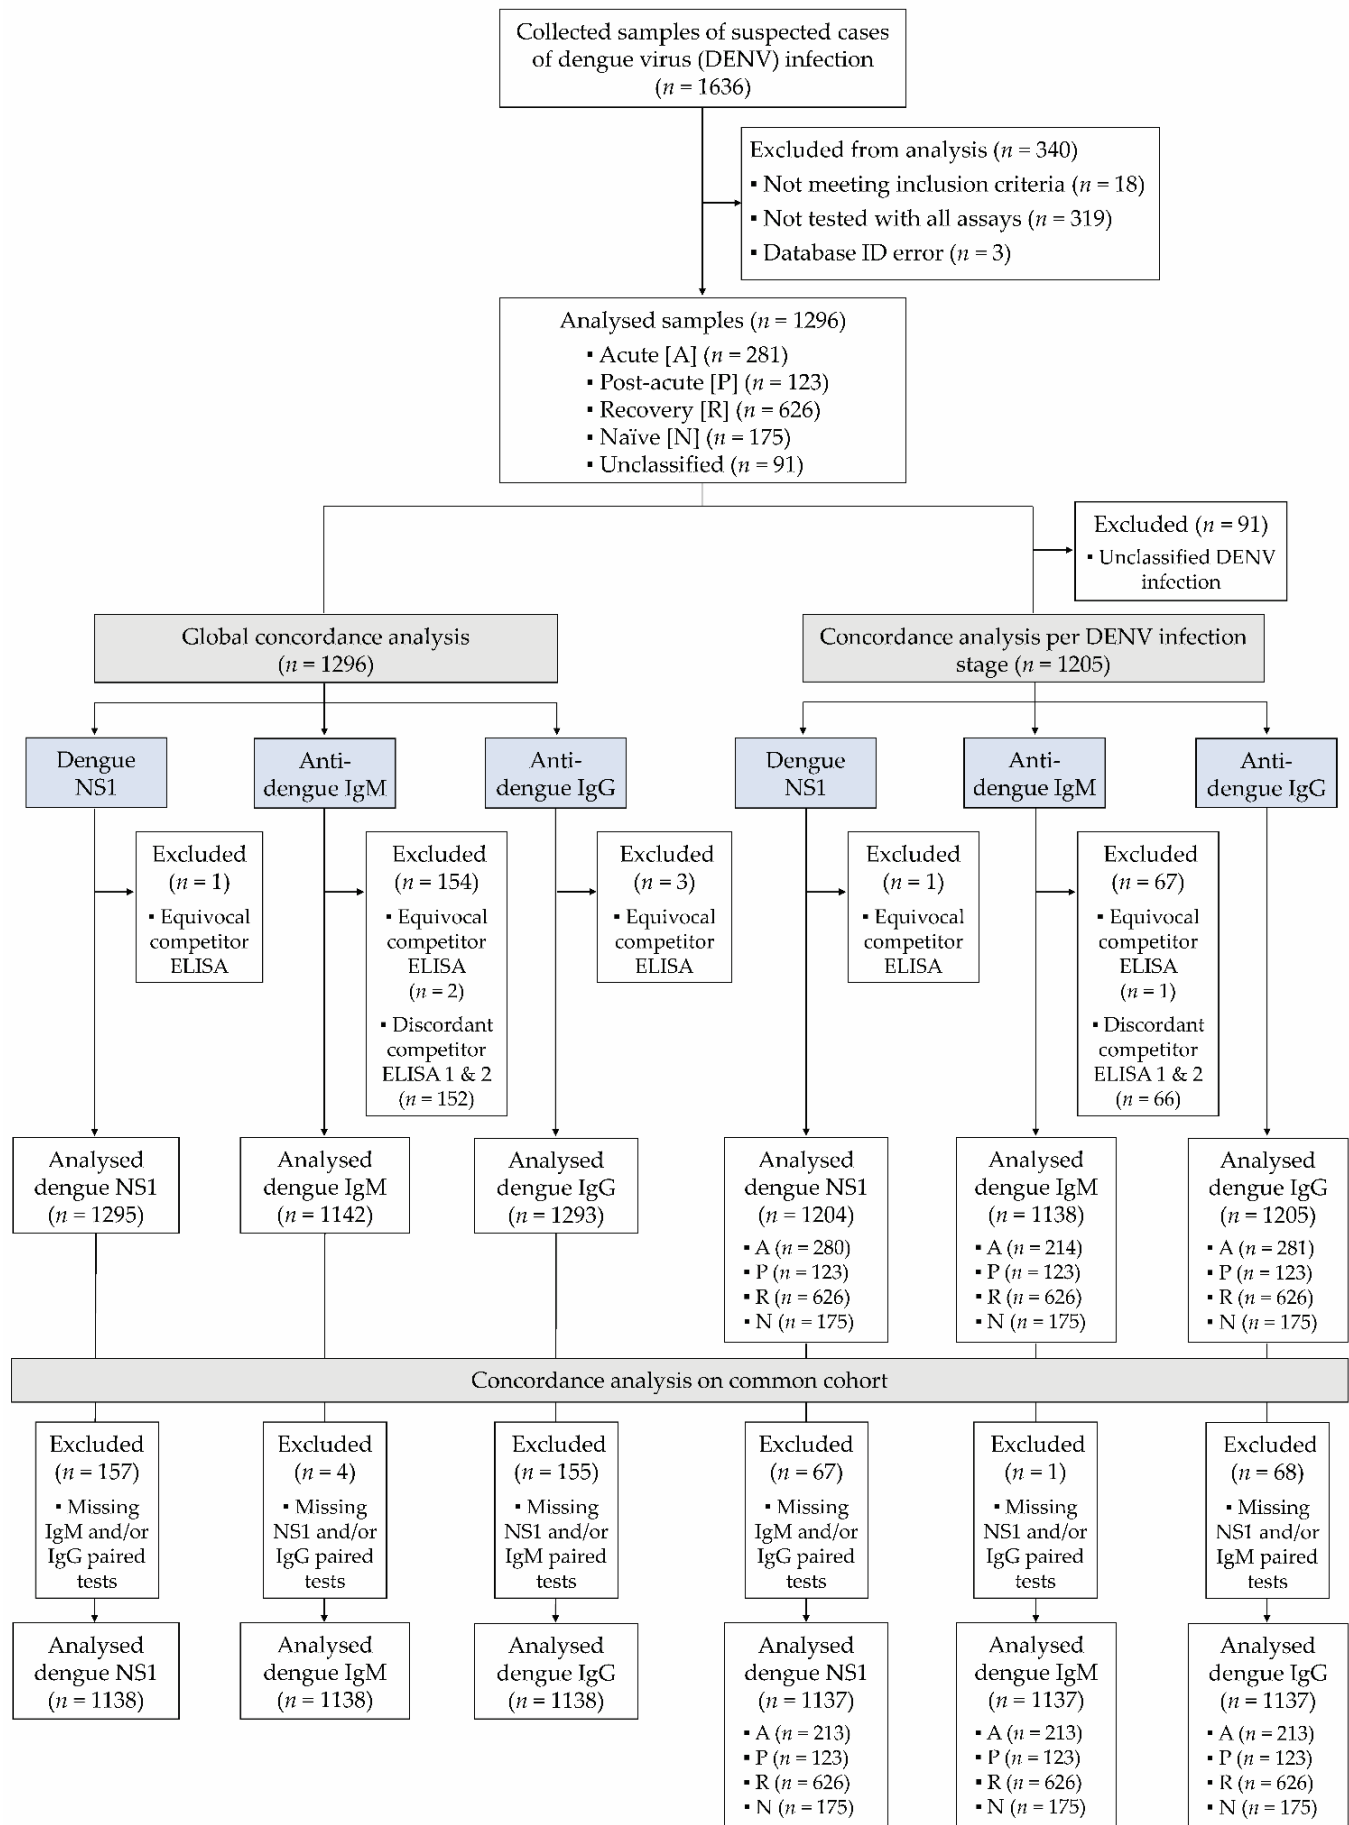

**Figure S2.** Extended study flow diagram describing the concordance analysis on common samples shown in Table S5.

**Table S1.** Distribution of samples according to the time from symptom onset, per DENV infection stage.

| Days from symptom onset  | Stage of DENV infection <sup>1</sup> , <i>N</i> (%) |             |             |            |              | Total |
|--------------------------|-----------------------------------------------------|-------------|-------------|------------|--------------|-------|
|                          | Acute                                               | Post-Acute  | Recovery    | Naïve      | Unclassified |       |
| <b>0 – 3 days</b>        | 102 (36.3%)                                         | 6 (4.9%)    | 258 (41.2%) | 88 (50.3%) | 23 (25.3%)   | 477   |
| <b>4 – 5 days</b>        | 61 (21.7%)                                          | 7 (5.7%)    | 119 (19.0%) | 24 (13.7%) | 17 (18.7%)   | 228   |
| <b>6 – 8 days</b>        | 95 (33.8%)                                          | 101 (82.1%) | 169 (27.0%) | 48 (27.4%) | 43 (47.2%)   | 456   |
| <b>9 – 15 days</b>       | 11 (3.9%)                                           | 8 (6.5%)    | 43 (6.9%)   | 12 (6.9%)  | 4 (4.4%)     | 78    |
| <b>16 days – 1 month</b> | 7 (2.5%)                                            | 0 (0.0%)    | 23 (3.7%)   | 2 (1.1%)   | 2 (2.2%)     | 34    |
| <b>&gt; 1 month</b>      | 1 (0.4%)                                            | 0 (0.0%)    | 12 (1.9%)   | 1 (0.6%)   | 2 (2.2%)     | 16    |
| <b>Unknown</b>           | 4 (1.4%)                                            | 1 (0.8%)    | 2 (0.3%)    | 0 (0.0%)   | 0 (0.0%)     | 7     |
| <b>Total</b>             | 281                                                 | 123         | 626         | 175        | 91           | 1296  |

<sup>1</sup> As defined in Table 3.

**Table S2.** Median and interquartile range (IQR) of VIDAS® dengue assays, in the total population and per DENV infection stage (see Figure S1).

| VIDAS®<br>dengue<br>assay | variable | DENV infection stage |          |            |            |          |         |              |
|---------------------------|----------|----------------------|----------|------------|------------|----------|---------|--------------|
|                           |          | Total                | Acute    | Acute D0-5 | Post-Acute | Recovery | Naïve   | Unclassified |
| NS1                       | <i>N</i> | 1296                 | 281      | 163        | 123        | 626      | 175     | 91           |
|                           | Median   | 0.2                  | 2.8      | 10.5       | 0.2        | 0.1      | 0.1     | 0.1          |
|                           | IQR      | 0.1-0.3              | 0.4-54.1 | 1.6-81.1   | 0.1-0.3    | 0.1-0.2  | 0.1-0.2 | 0.1-0.2      |
| IgM                       | <i>N</i> | 1296                 | 281      | 163        | 123        | 626      | 175     | 91           |
|                           | Median   | 0.6                  | 2.1      | 4.7        | 2.5        | 0.4      | 0.4     | 0.6          |
|                           | IQR      | 0.3-2.0              | 0.6-8.9  | 0.6-18.0   | 1.0-7.6    | 0.2-0.9  | 0.2-0.6 | 0.3-1.7      |
| IgG                       | <i>N</i> | 1296                 | 281      | 163        | 123        | 626      | 175     | 91           |
|                           | Median   | 6.7                  | 6.2      | 10.7       | 53.0       | 8.2      | 0.4     | 19.6         |
|                           | IQR      | 1.0-19.2             | 0.7-25.3 | 2.2-29.7   | 1.4-65.3   | 3.4-15.1 | 0.2-0.6 | 4.6-41.5     |

**Table S3.** Percentage of positive test results of combined NS1/IgM and IgM/IgG VIDAS® dengue assays *vs.* single assays, in the acute and post-acute stages of DENV infection, respectively.

| Population   | VIDAS® dengue assay  | % positive test results |                   |
|--------------|----------------------|-------------------------|-------------------|
|              |                      | <i>n/N</i> <sup>1</sup> | % [95% CI]        |
| Acute (all)  | NS1                  | 194/281                 | 69.0% [63.4-74.2] |
|              | IgM                  | 175/281                 | 62.3% [56.5-67.7] |
|              | NS1/IgM <sup>2</sup> | 233/281                 | 82.9% [78.1-86.9] |
| Acute (D0-5) | NS1                  | 131/163                 | 80.4% [73.6-85.7] |
|              | IgM                  | 108/163                 | 66.3% [58.7-73.1] |
|              | NS1/IgM <sup>2</sup> | 141/163                 | 86.5% [80.4-90.9] |
| Post-Acute   | IgM                  | 92/123                  | 74.8% [66.5-81.6] |
|              | IgG                  | 99/123                  | 80.5% [72.6-86.5] |
|              | IgM/IgG <sup>3</sup> | 113/123                 | 91.9% [85.7-95.5] |

<sup>1</sup> *n/N* is the ratio of the number of samples positive with the respective VIDAS® Dengue assays to the total number of samples in the indicated DENV infection stage. <sup>2</sup> Percentage of tests positive for VIDAS® NS1 and/or IgM; <sup>3</sup> Percentage of tests positive for VIDAS® IgM and/or IgG. Abbreviations: CI, confidence interval; D0-5, 0-5 days post symptom-onset.

**Table S4.** Description of the discordant infection stage classifications between the VIDAS®-based and the competitor ELISA-based algorithm

| Stage of DENV infection <sup>3</sup> | Disagreement                | VIDAS®-based classification ( <i>n</i> ) <sup>2</sup> |            |          |       |              |
|--------------------------------------|-----------------------------|-------------------------------------------------------|------------|----------|-------|--------------|
|                                      | <i>n/N</i> <sup>1</sup> (%) | Acute                                                 | Post-Acute | Recovery | Naïve | Unclassified |
| <b>Acute (all)</b>                   | 32/281 (11.4%)              | -                                                     | 18         | 4        | 3     | 7            |
| <b>Acute (D0-5)</b>                  | 7/163 (4.3%)                | -                                                     | 5          | 1        | 0     | 1            |
| <b>Post-Acute</b>                    | 45/123 (36.6%)              | 0                                                     | -          | 21       | 10    | 14           |
| <b>Recovery</b>                      | 196/626 (31.3%)             | 5                                                     | 132        | -        | 46    | 13           |
| <b>Naïve</b>                         | 33/175 (18.9%)              | 0                                                     | 9          | 10       | -     | 14           |
| <b>Unclassified</b>                  | 89/91 (97.8%)               | 1                                                     | 31         | 50       | 7     | -            |

<sup>1</sup> *n/N* is the ratio of the number of samples whose classification using the defined rules (Table 3) by the VIDAS® assays was discordant with that by the competitor ELISA, to the number of samples classified by the competitor ELISA-based algorithm; <sup>2</sup> *n* is the number of discordant samples per stage (according to VIDAS®-based classification). <sup>3</sup> According to the RT-PCR- and competitor ELISA-based algorithm (Table 3).

**Table S5.** Concordance of the VIDAS® dengue assays with the respective competitor ELISA, in the global population and per stage of DENV infection (common samples; see Figure S2)

| VIDAS®<br>dengue<br>assay | Population   | Positive Agreement      |                   | Negative Agreement      |                     | Overall Agreement       |                   |
|---------------------------|--------------|-------------------------|-------------------|-------------------------|---------------------|-------------------------|-------------------|
|                           |              | <i>n/N</i> <sup>1</sup> | %<br>[95% CI]     | <i>n/N</i> <sup>1</sup> | %<br>[95% CI]       | <i>n/N</i> <sup>1</sup> | %<br>[95% CI]     |
| NS1                       | Total        | 135/170                 | 79.4% [72.7-84.8] | 963/968                 | 99.5% [98.8-99.8]   | 1098/1138               | 96.5% [95.2-97.5] |
|                           | Acute (all)  | 135/170                 | 79.4% [72.7-84.8] | 43/43                   | 100.0% [91.8-100.0] | 178/213                 | 83.6% [78.0-87.9] |
|                           | Acute (D0-5) | 89/98                   | 90.8% [83.5-95.1] | 20/20                   | 100.0% [83.2-100.0] | 109/118                 | 92.4% [86.1-95.9] |
|                           | Post-Acute   | N/A                     | -                 | 123/123                 | 100.0% [97.0-100.0] | N/A                     | -                 |
|                           | Recovery     | N/A                     | -                 | 621/626                 | 99.2% [98.1-99.7]   | N/A                     | -                 |
| IgM                       | Total        | 213/266                 | 80.1% [74.9-84.4] | 686/872                 | 78.7% [75.8-81.3]   | 899/1138                | 79.0% [76.5-81.3] |
|                           | Acute (all)  | 120/142                 | 84.5% [77.7-89.5] | 57/71                   | 80.3% [69.6-87.9]   | 177/213                 | 83.1% [77.5-87.5] |
|                           | Acute (D0-5) | 65/74                   | 87.8% [78.5-93.5] | 34/44                   | 77.3% [63.0-87.2]   | 99/118                  | 83.9% [76.2-89.4] |
|                           | Post-Acute   | 92/123                  | 74.8% [66.5-81.6] | N/A                     | -                   | N/A                     | -                 |
|                           | Recovery     | N/A                     | -                 | 477/626                 | 76.2% [72.7-79.4]   | N/A                     | -                 |
| IgG                       | Total        | 811/948                 | 85.5% [83.2-87.6] | 164/190                 | 86.3% [80.7-90.5]   | 975/1138                | 85.7% [83.5-87.6] |
|                           | Acute (all)  | 145/199                 | 72.9% [66.3-78.6] | 8/14                    | 57.1% [32.6-78.6]   | 153/213                 | 71.8% [65.4-77.4] |
|                           | Acute (D0-5) | 91/110                  | 82.7% [74.6-88.7] | 2/8                     | 25.0% [7.1-59.1]    | 93/118                  | 78.8% [70.6-85.2] |
|                           | Post-Acute   | 99/123                  | 80.5% [72.6-86.5] | N/A                     | -                   | N/A                     | -                 |
|                           | Recovery     | 567/626                 | 90.6% [88.0-92.6] | N/A                     | -                   | N/A                     | -                 |

<sup>1</sup> *n/N* is the ratio of the number of samples for which VIDAS® assays are in agreement (positive, negative and overall) with the competitor ELISA (reference test) to the number of samples tested either positive or negative (and overall) with the competitor ELISA. Abbreviations: CI, confidence interval; D0-5, 0-5 days post symptom-onset; N/A, not applicable.

**Table S6.** Concordance of the VIDAS® dengue assays with the respective competitor ELISA, according to time intervals post symptom onset.

|                           |                                     | Positive Percent Agreement       |                              | Negative Percent Agreement       |                              | Overall Percent Agreement        |                              |
|---------------------------|-------------------------------------|----------------------------------|------------------------------|----------------------------------|------------------------------|----------------------------------|------------------------------|
| VIDAS®<br>dengue<br>assay | Time interval post<br>symptom onset | <i>n</i> / <i>N</i> <sup>1</sup> | % [95% CI]                   | <i>n</i> / <i>N</i> <sup>1</sup> | % [95% CI]                   | <i>n</i> / <i>N</i> <sup>1</sup> | % [95% CI]                   |
| NS1                       | 0 – 3 days                          | 79 / 84                          | 94.05% [ 86.81 ; 97.43 ] %   | 388 / 392                        | 98.98% [ 97.41 ; 99.72 ] %   | 467 / 476                        | 98.11% [ 96.44 ; 99.13 ] %   |
|                           | 4 – 5 days                          | 49 / 54                          | 90.74% [ 80.09 ; 95.98 ] %   | 172 / 174                        | 98.85% [ 95.91 ; 99.86 ] %   | 221 / 228                        | 96.93% [ 93.78 ; 98.76 ] %   |
|                           | 6 – 8 days                          | 55 / 77                          | 71.43% [ 60.51 ; 80.31 ] %   | 377 / 379                        | 99.47% [ 98.11 ; 99.94 ] %   | 432 / 456                        | 94.74% [ 92.29 ; 96.44 ] %   |
|                           | 9 – 15 days                         | 4 / 7                            | 57.14% [ 25.05 ; 84.18 ] %   | 71 / 71                          | 100.00% [ 94.94 ; 100.00 ] % | 75 / 78                          | 96.15% [ 89.17 ; 99.20 ] %   |
|                           | 16 days – 1 month                   | 0 / 3                            | 0.00% [ 0.00 ; 70.76 ] %     | 31 / 31                          | 100.00% [ 88.78 ; 100.00 ] % | 31 / 34                          | 91.18% [ 77.04 ; 96.95 ] %   |
|                           | > 1 month                           | 0 / 0                            | . [ 0.00 ; 0.00 ] %          | 16 / 16                          | 100.00% [ 79.41 ; 100.00 ] % | 16 / 16                          | 100.00% [ 79.41 ; 100.00 ] % |
|                           | Unknown                             | 4 / 4                            | 100.00% [ 39.76 ; 100.00 ] % | 3 / 3                            | 100.00% [ 29.24 ; 100.00 ] % | 7 / 7                            | 100.00% [ 59.04 ; 100.00 ] % |
| IgM                       | 0 – 3 days                          | 39 / 46                          | 84.78% [ 71.78 ; 92.43 ] %   | 300 / 380                        | 78.95% [ 74.57 ; 82.75 ] %   | 339 / 426                        | 79.58% [ 75.49 ; 83.13 ] %   |
|                           | 4 – 5 days                          | 37 / 41                          | 90.24% [ 77.45 ; 96.14 ] %   | 110 / 157                        | 70.06% [ 62.49 ; 76.68 ] %   | 147 / 198                        | 74.24% [ 67.73 ; 79.83 ] %   |
|                           | 6 – 8 days                          | 126 / 164                        | 76.83% [ 69.80 ; 82.63 ] %   | 193 / 233                        | 82.83% [ 77.47 ; 87.13 ] %   | 319 / 397                        | 80.35% [ 76.16 ; 83.96 ] %   |
|                           | 9 – 15 days                         | 9 / 11                           | 81.82% [ 52.30 ; 94.86 ] %   | 49 / 60                          | 81.67% [ 70.08 ; 89.44 ] %   | 58 / 71                          | 81.69% [ 71.15 ; 88.98 ] %   |
|                           | 16 days – 1 month                   | 0 / 0                            | . [ 0.00 ; 0.00 ] %          | 25 / 31                          | 80.65% [ 63.72 ; 90.81 ] %   | 25 / 31                          | 80.65% [ 63.72 ; 90.81 ] %   |
|                           | > 1 month                           | 1 / 1                            | 100.00% [ 2.50 ; 100.00 ] %  | 10 / 13                          | 76.92% [ 49.74 ; 91.82 ] %   | 11 / 14                          | 78.57% [ 52.41 ; 92.43 ] %   |
|                           | Unknown                             | 1 / 3                            | 33.33% [ 6.15 ; 79.23 ] %    | 2 / 2                            | 100.00% [ 15.81 ; 100.00 ] % | 3 / 5                            | 60.00% [ 23.07 ; 88.24 ] %   |
| IgG                       | 0 – 3 days                          | 344 / 380                        | 90.53% [ 87.16 ; 93.08 ] %   | 81 / 95                          | 85.26% [ 76.77 ; 91.01 ] %   | 425 / 475                        | 89.47% [ 86.39 ; 91.92 ] %   |
|                           | 4 – 5 days                          | 174 / 200                        | 87.00% [ 81.63 ; 90.97 ] %   | 22 / 27                          | 81.48% [ 63.30 ; 91.82 ] %   | 196 / 227                        | 86.34% [ 81.27 ; 90.21 ] %   |
|                           | 6 – 8 days                          | 326 / 400                        | 81.50% [ 77.40 ; 85.00 ] %   | 52 / 56                          | 92.86% [ 83.02 ; 97.19 ] %   | 378 / 456                        | 82.89% [ 79.17 ; 86.07 ] %   |
|                           | 9 – 15 days                         | 52 / 66                          | 78.79% [ 67.49 ; 86.92 ] %   | 9 / 12                           | 75.00% [ 46.77 ; 91.11 ] %   | 61 / 78                          | 78.21% [ 67.84 ; 85.92 ] %   |
|                           | 16 days – 1 month                   | 27 / 30                          | 90.00% [ 74.38 ; 96.54 ] %   | 4 / 4                            | 100.00% [ 39.76 ; 100.00 ] % | 31 / 34                          | 91.18% [ 77.04 ; 96.95 ] %   |
|                           | > 1 month                           | 11 / 14                          | 78.57% [ 52.41 ; 92.43 ] %   | 2 / 2                            | 100.00% [ 15.81 ; 100.00 ] % | 13 / 16                          | 81.25% [ 56.99 ; 93.41 ] %   |
|                           | Unknown                             | 6 / 6                            | 100.00% [ 54.07 ; 100.00 ] % | 0 / 1                            | 0.00% [ 0.00 ; 97.50 ] %     | 6 / 7                            | 85.71% [ 48.69 ; 97.43 ] %   |

<sup>1</sup> *n*/*N* is the ratio of the number of samples for which VIDAS® assays are in agreement (positive, negative and overall) with the competitor ELISA (reference test) to the number of samples tested either positive or negative (and overall) with the competitor ELISA. Abbreviation: CI, confidence interval
